# Supplementary material
Source: PubMed Central journal article supplement (PMC10726699)
Supplement: NIHMS1947234-supplement-2.pdf [file NIHMS1947234-supplement-2.pdf]

# CNV Query



All coordinates are 0-based and use the GRCh38/hg38 reference.

- [CNV Query History](#)
- [Saved CNV Queries](#)
- [Advanced CNV Query](#)

## What Can You Do?

With the one box CNV query, you can quickly make certain queries as shown in the table below.

|                                                          |
|----------------------------------------------------------|
| <b>Copy number variations for a specific gene symbol</b> |
| LAMB2P1                                                  |
| <b>Copy number variations for a genomic interval</b>     |
| chr2-50497000-50498000, chr2:50497000-50498000           |
| <b>Copy number variations for a specific subject</b>     |
| 2-1116-003                                               |
| <b>Copy number variations for a specific family</b>      |
| FAM_1-0007-003                                           |

## B

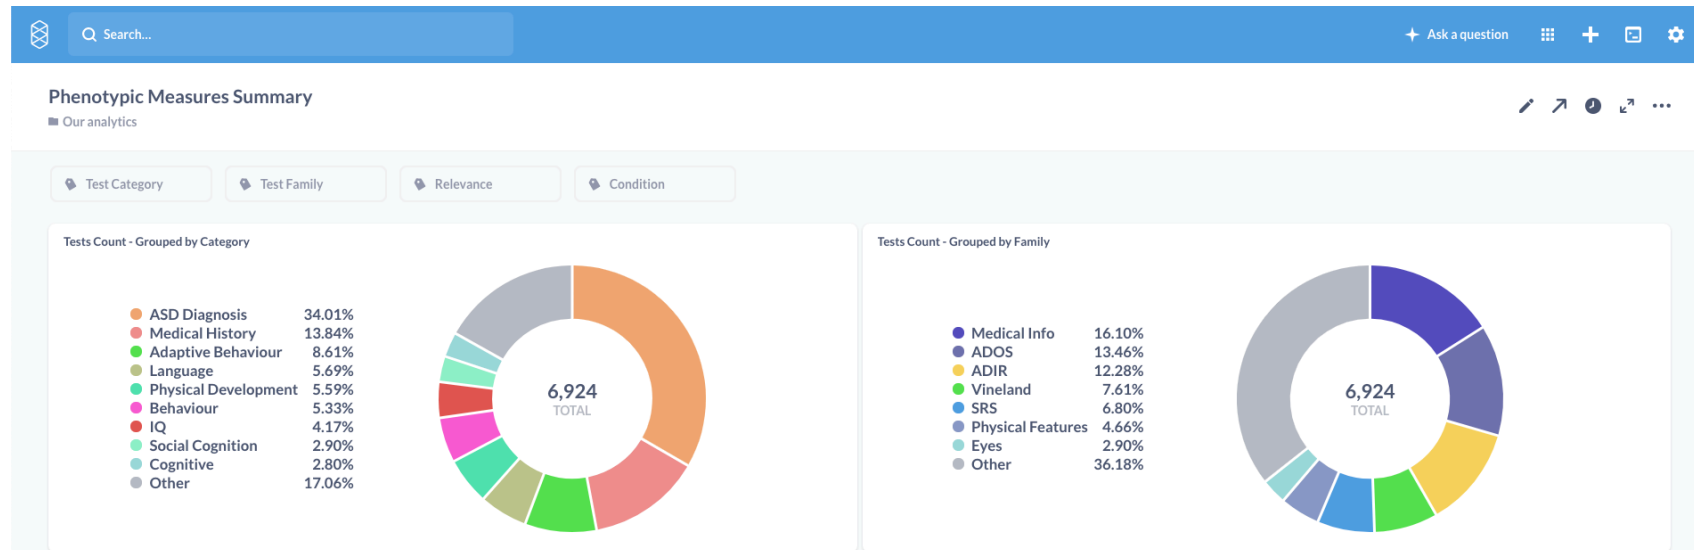

## C

### Query subject\_sample data

The `subject_sample` table contains information about each subject's DNA sample, including:

- The source of the DNA
- The sequencing platform
- Predicted ancestry
- The IDs of the subject's relatives
- Quality control information

```
In [7]: subject_sample_df = pd.read_gbq(f'''
SELECT * FROM `BQ_RELEASE_DATASET.subject_sample`
...''')
```

### Display subject\_sample data

Head

```
In [8]: subject_sample_df.head()
```

| Out[8]: | SUBMITTEDID | INDEXID   | DNASOURCE | PLATFORM        | NIMHID    | RUDCRID  | COMMENTS           | SOFTWARE_VERSION | PREDICTED_ANCESTRY | father_SUBMITTEDID | mother_SUBMITTEDID | sample_QC |
|---------|-------------|-----------|-----------|-----------------|-----------|----------|--------------------|------------------|--------------------|--------------------|--------------------|-----------|
| 0       | AU3610201   | AU3610201 | Blood     | Illumina HiSeqX | 10C115445 | 05C48759 | high het/hom ratio | None             | AFR                | 0                  | 0                  | QC_FAIL   |
| 1       | AU1961303   | AU1961303 | Blood     | Illumina HiSeqX | 07C65590  | 08C78532 | None               | None             | AFR                | 0                  | 0                  | ok        |
| 2       | AU1995201   | AU1995201 | Cell line | Illumina HiSeqX | 07C69088  | 08C78918 | None               | None             | AFR                | 0                  | 0                  | ok        |
| 3       | AU2103301   | AU2103301 | Blood     | Illumina HiSeqX | 07C71054  | 08C76270 | None               | None             | AFR                | 0                  | 0                  | ok        |
| 4       | AU2107302   | AU2107302 | Blood     | Illumina HiSeqX | 08C72389  | 08C76392 | None               | None             | AFR                | 0                  | 0                  | ok        |
