# Supplementary material
Source: PubMed Central journal article supplement (PMC10726699)

**A**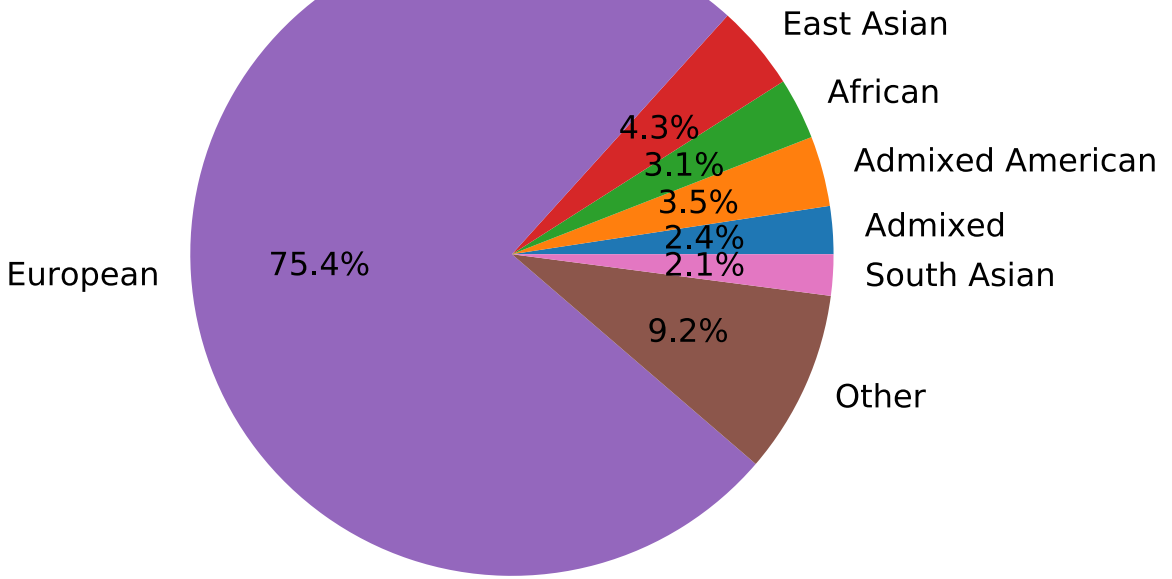**B**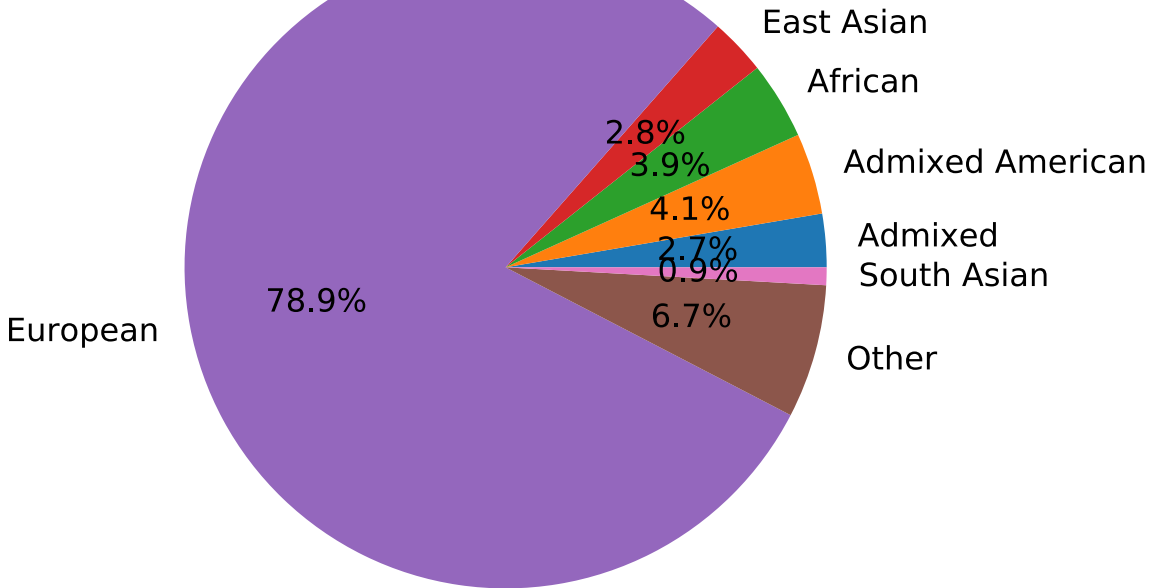**C**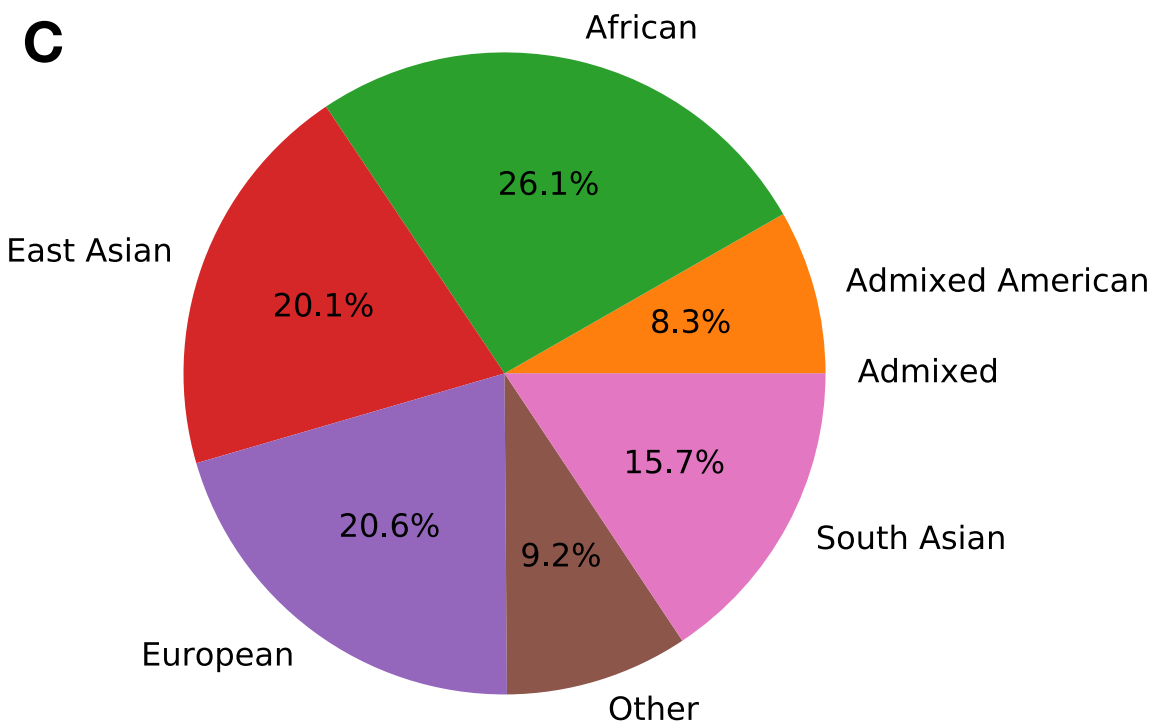

Supplement: NIHMS1947234-supplement-1.pdf [file NIHMS1947234-supplement-1.pdf]

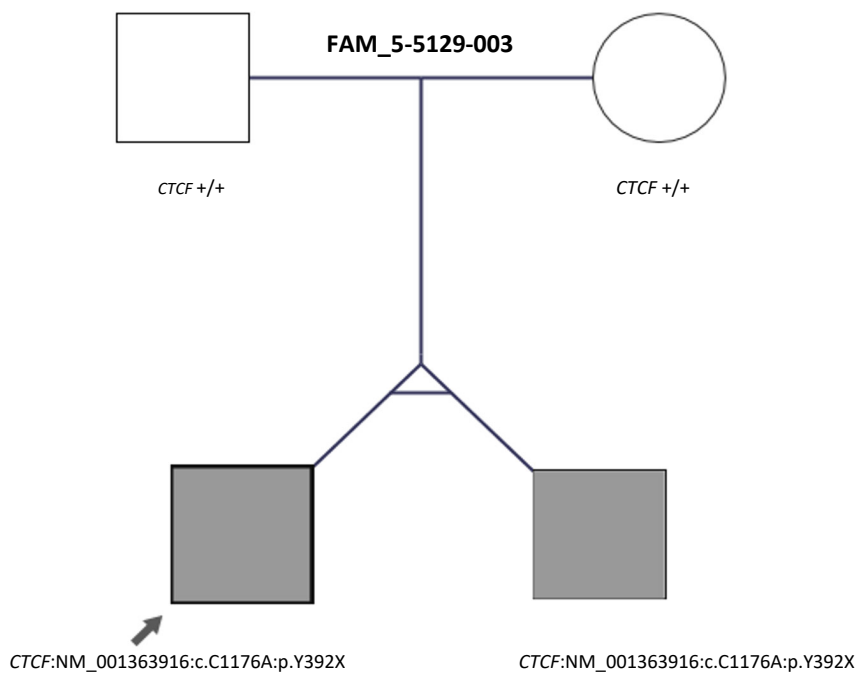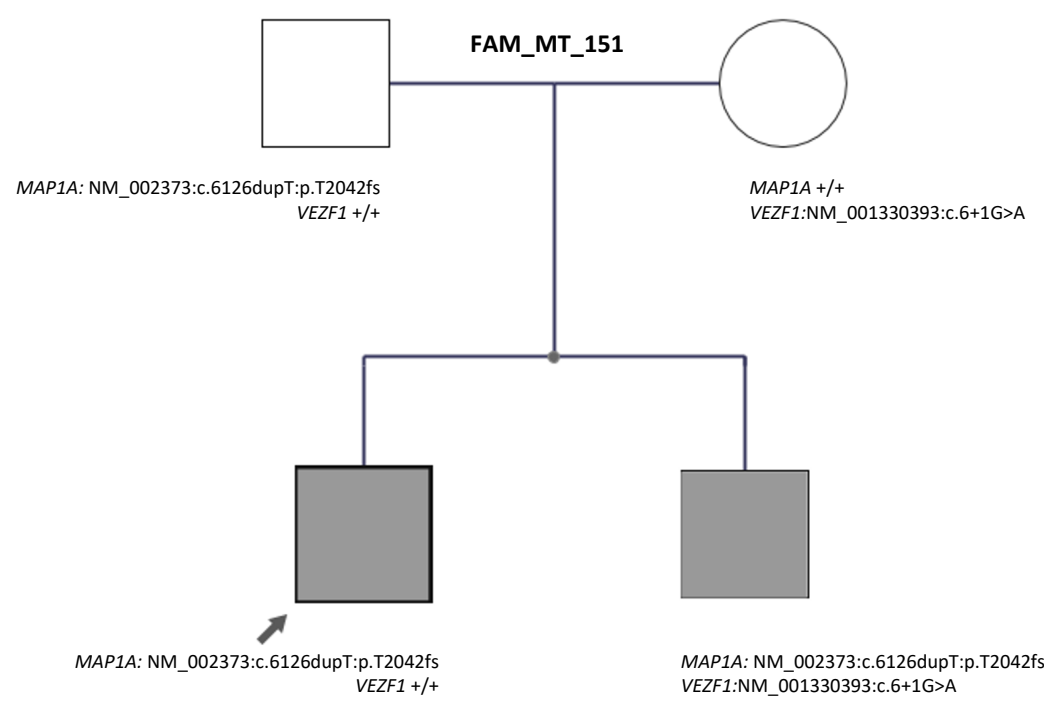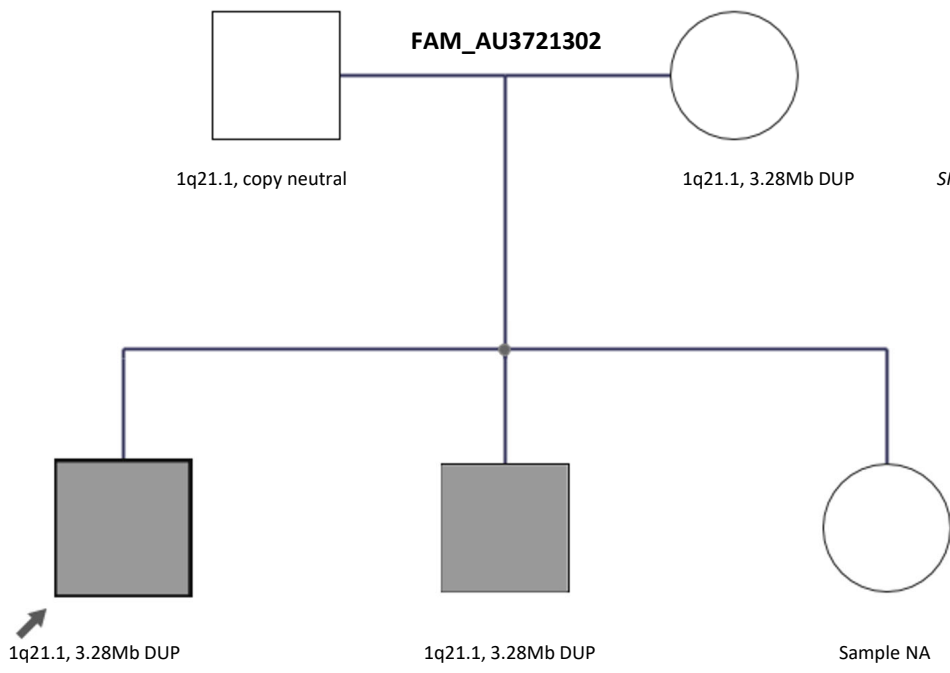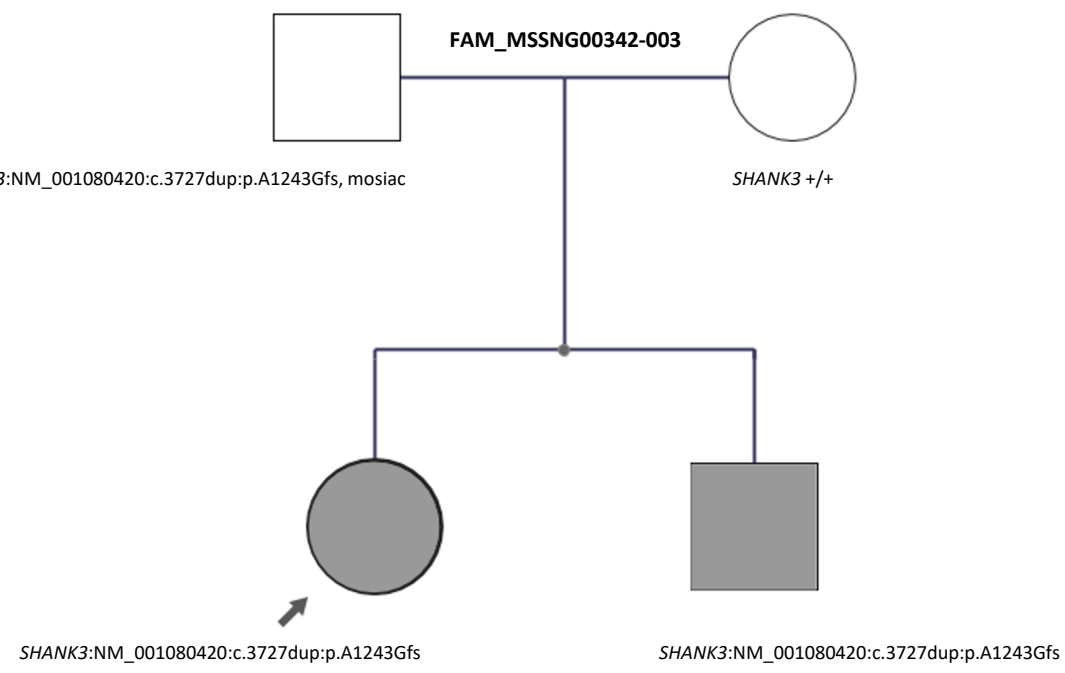

Supplement: NIHMS1947234-supplement-4.pdf [file NIHMS1947234-supplement-4.pdf]

**A**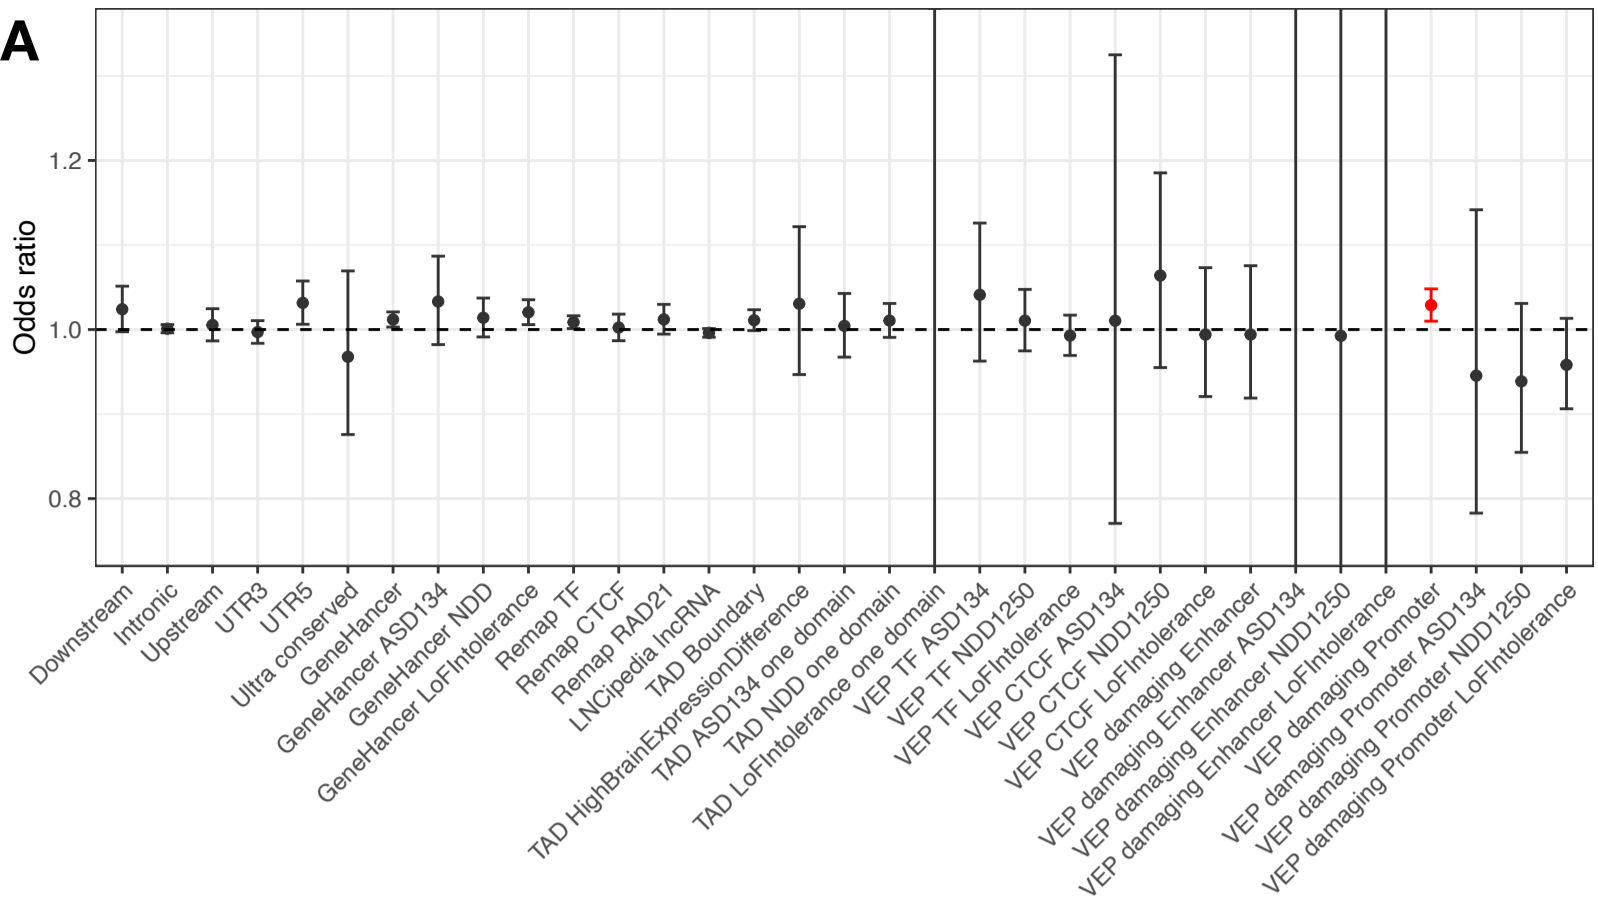**B**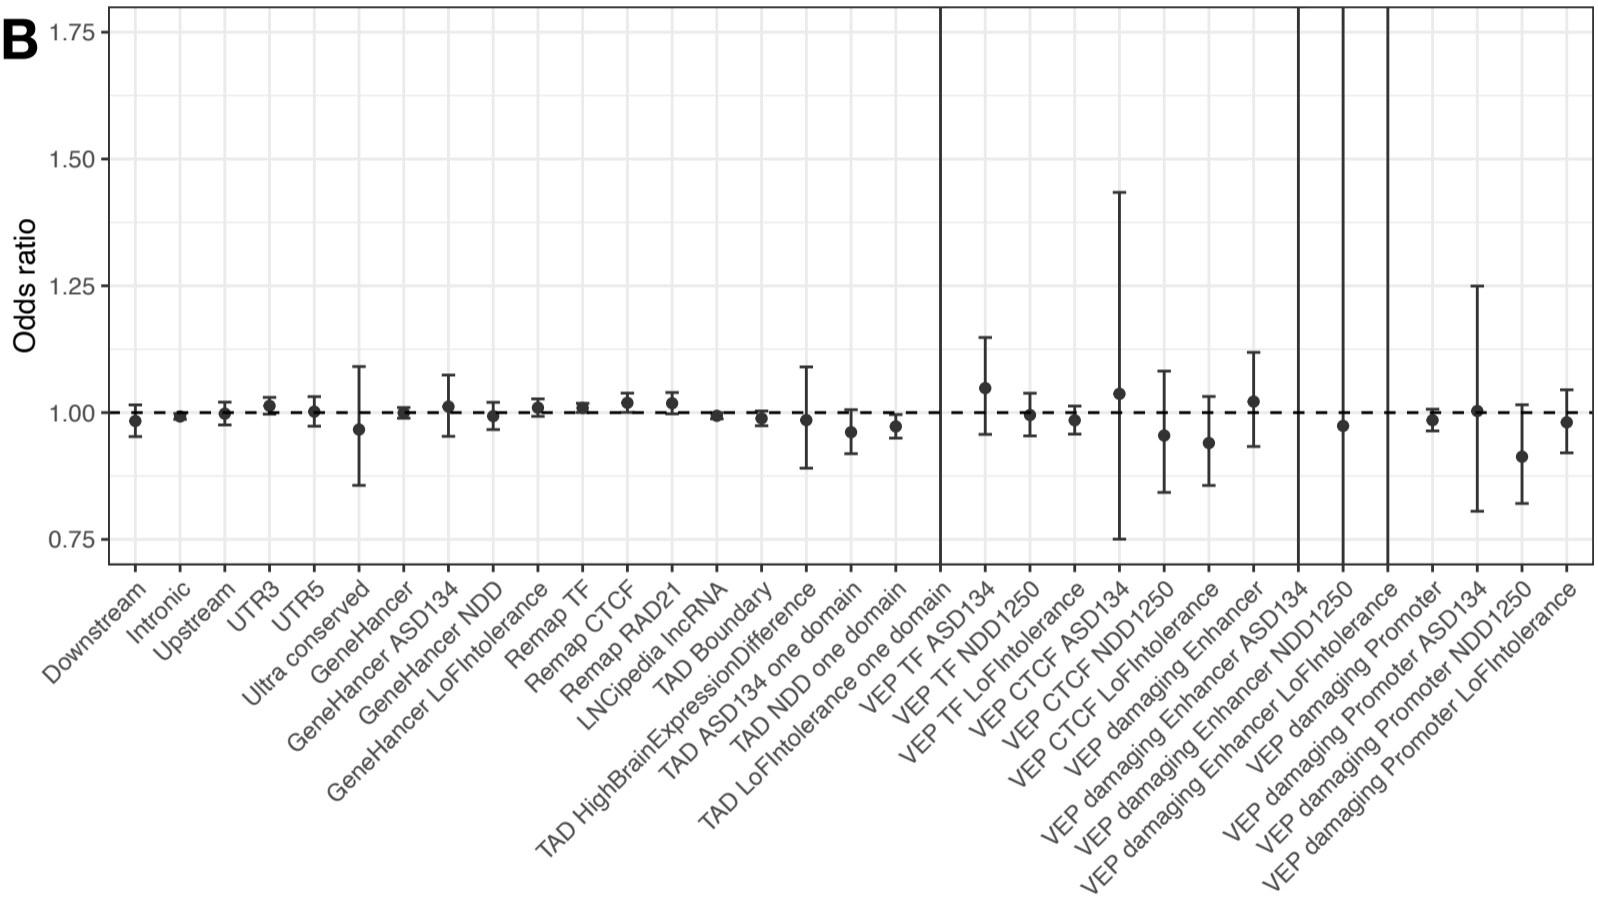**C**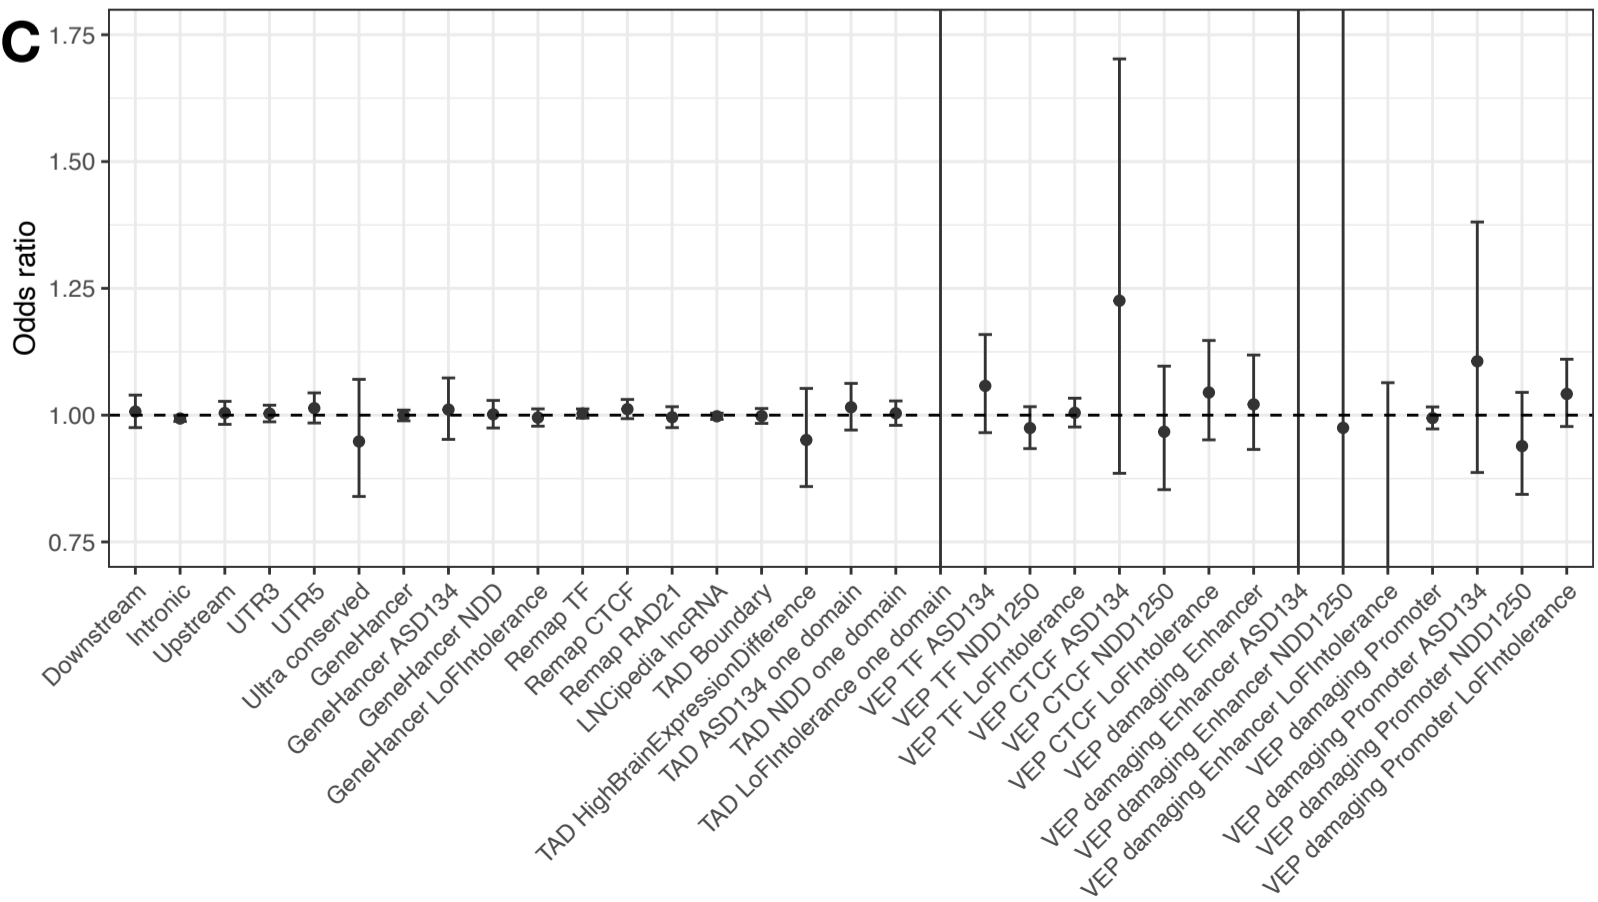

Supplement: NIHMS1947234-supplement-5.pdf [file NIHMS1947234-supplement-5.pdf]

**A**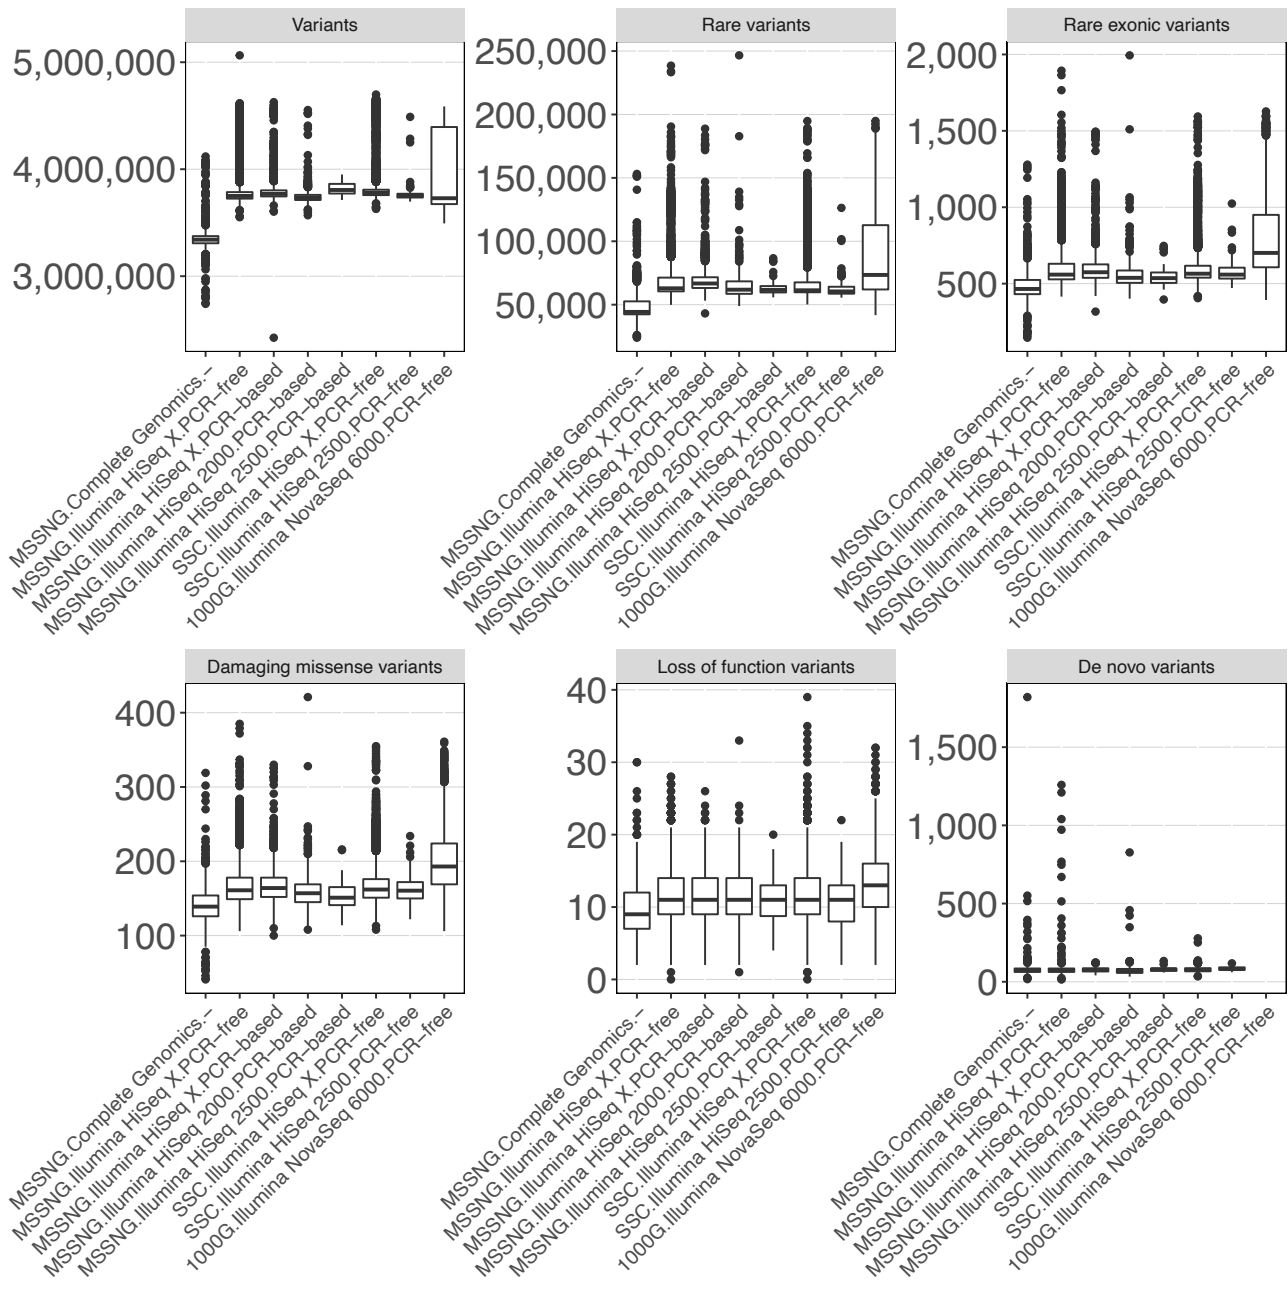**B**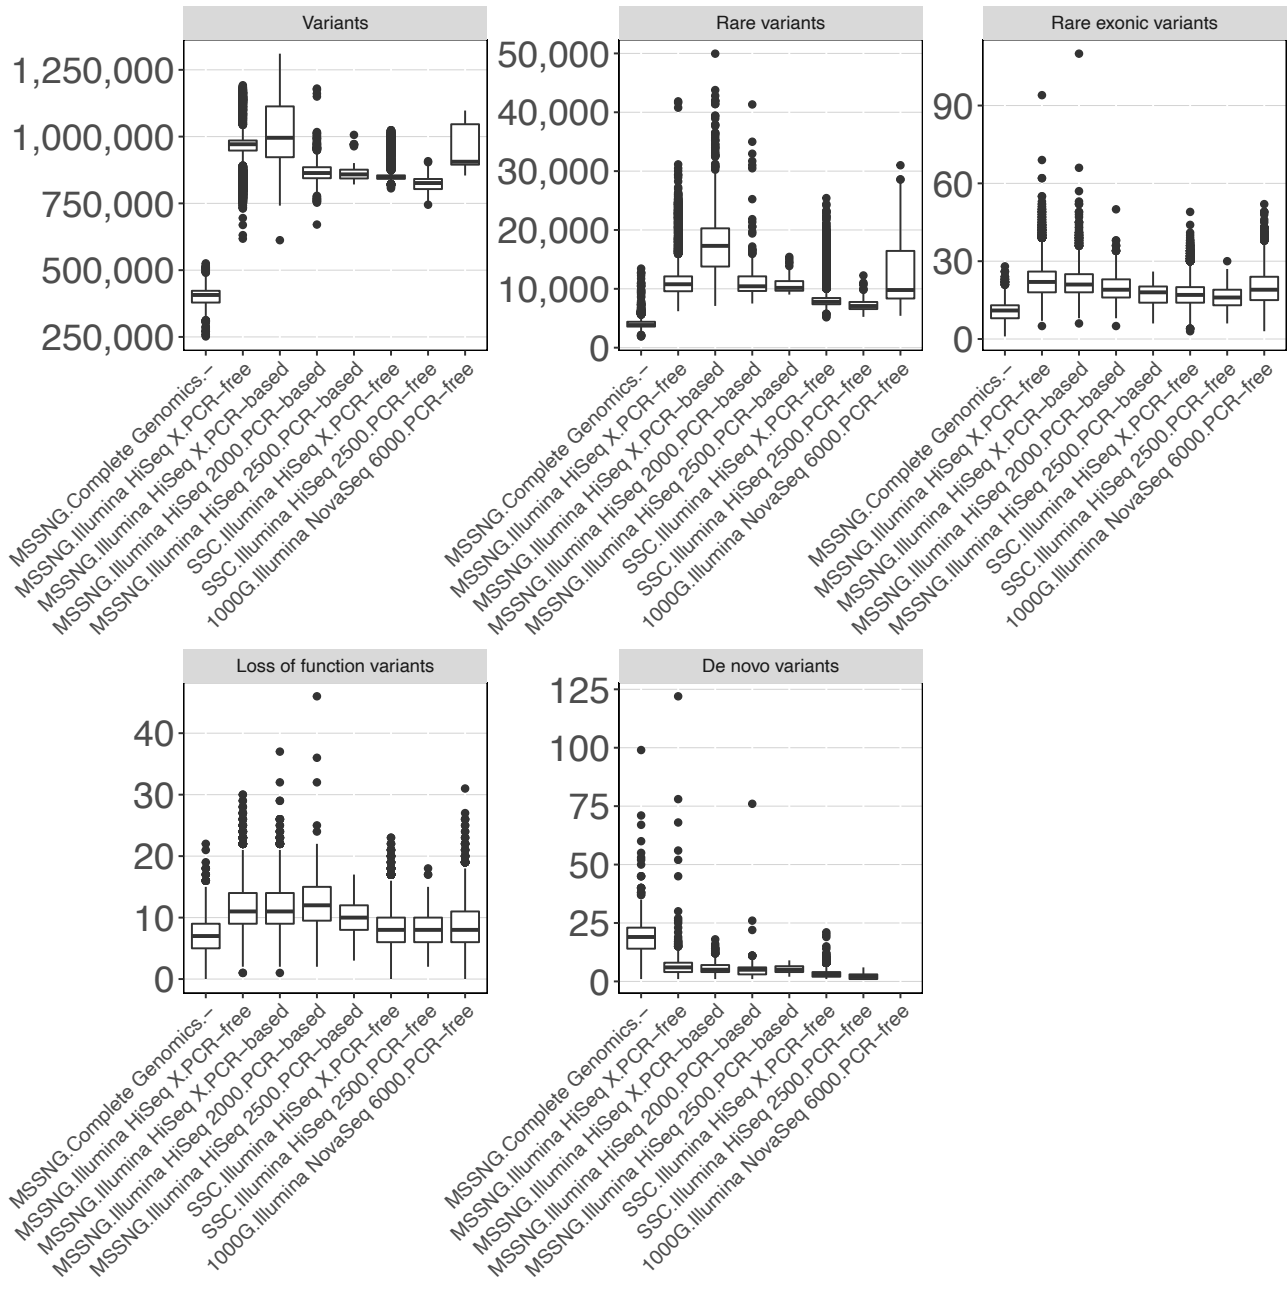

Supplement: NIHMS1947234-supplement-7.pdf [file NIHMS1947234-supplement-7.pdf]
